# Supplementary material for: Zwitterionic Modification of Polyethyleneimine for Efficient In Vitro siRNA Delivery
Source: MDPI journal article supplement (doi:10.3390/ijms23095014), 2022-04-30
Supplement: s1 [file s1]

## Supporting Information

### Zwitterionic Modification of Polyethyleneimine for Efficient *in vitro* siRNA Delivery

Fengfan Liu<sup>1</sup>, Huahui Su<sup>1</sup>, Mengqian Li<sup>1</sup>, Wanxuan Xie<sup>1</sup>, Yunfeng Yan<sup>2\*</sup> and Qi Shuai<sup>1\*</sup>

<sup>1</sup> National Engineering Research Center for Process Development of Active Pharmaceutical Ingredients, Collaborative Innovation Center of Yangtze River Delta Region Green Pharmaceuticals, Zhejiang University of Technology, Hangzhou, P. R. China

<sup>2</sup> College of Biotechnology and Bioengineering, Zhejiang University of Technology, Hangzhou, Zhejiang 310014, China

\* Corresponding author

**Qi Shuai** - Collaborative Innovation Center of Yangtze River Delta Region Green Pharmaceuticals, Zhejiang University of Technology, Hangzhou 310014, PR China; E-mail: qshuai@zjut.edu.cn

**Yunfeng Yan** - College of Biotechnology and Bioengineering, Zhejiang University of Technology, Hangzhou, Zhejiang 310014, PR China; E-mail: yfyan@zjut.edu.cn

#### 1. Supporting Data

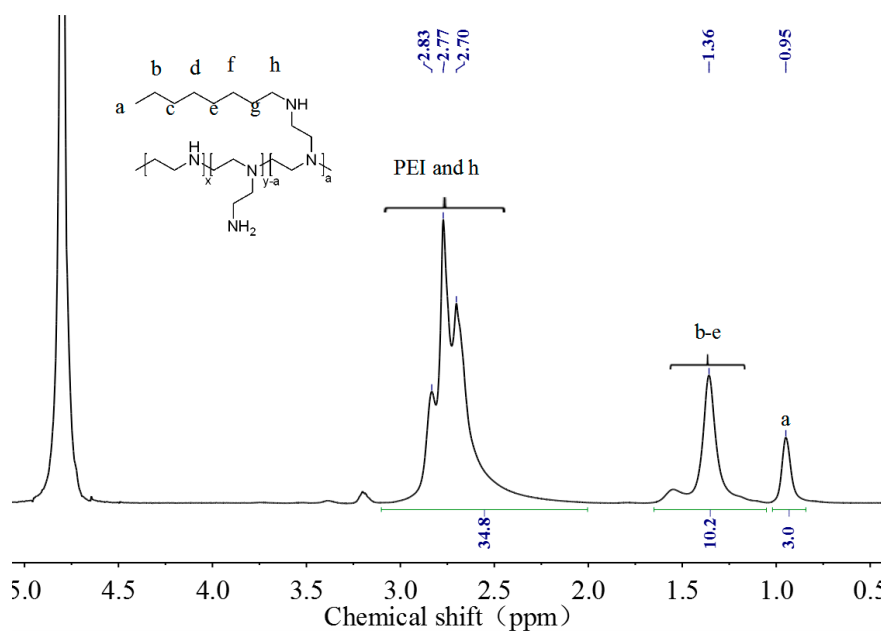

**Figure S1.** <sup>1</sup>H NMR spectra of 25-40

Calculation of the modification ratio of n-octanal to PEI:

$$\text{graft ratio} = \frac{\text{amount of octane chains of H-PEI}}{\text{amount of primary amine groups of PEI}} = \frac{a/3}{\text{PEI}/4 * 25\%} = 46.0\%$$

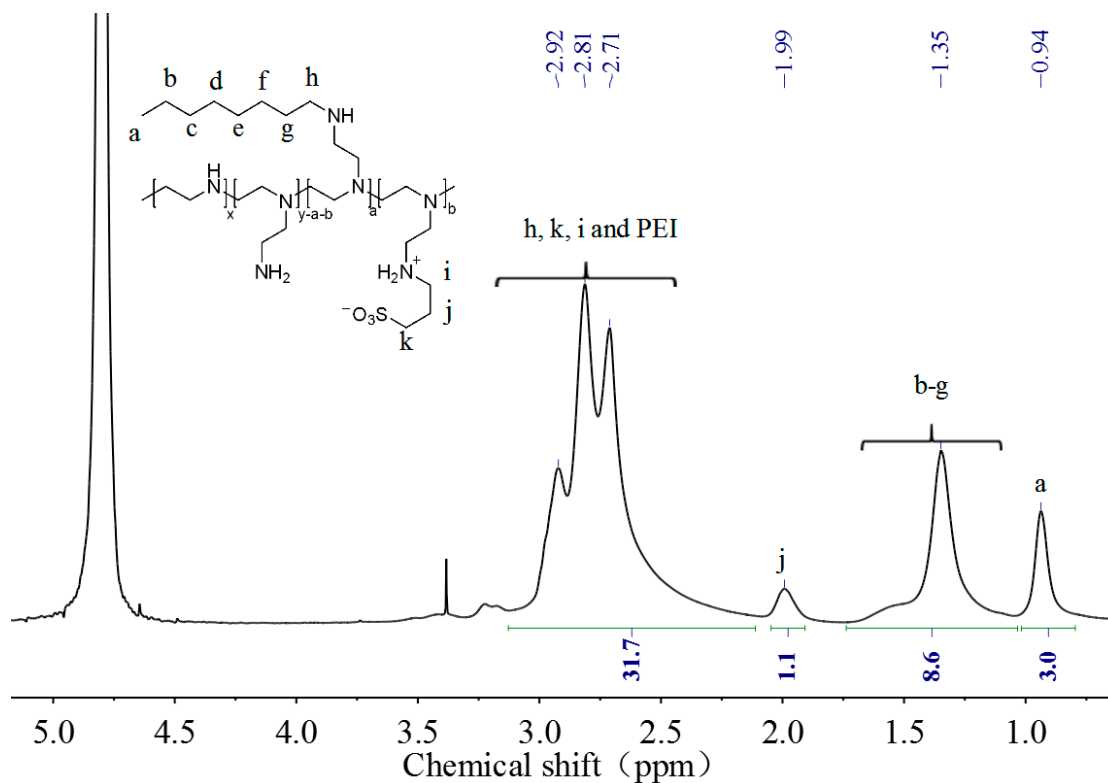

**Figure S2.** <sup>1</sup>H NMR spectra of 25-40-S-20

Calculation of the modification ratio of 1,3 propane sultone to H-PEI:

$$\text{graft ratio} = \frac{i/2}{a/3} * 40\% = 22\%$$

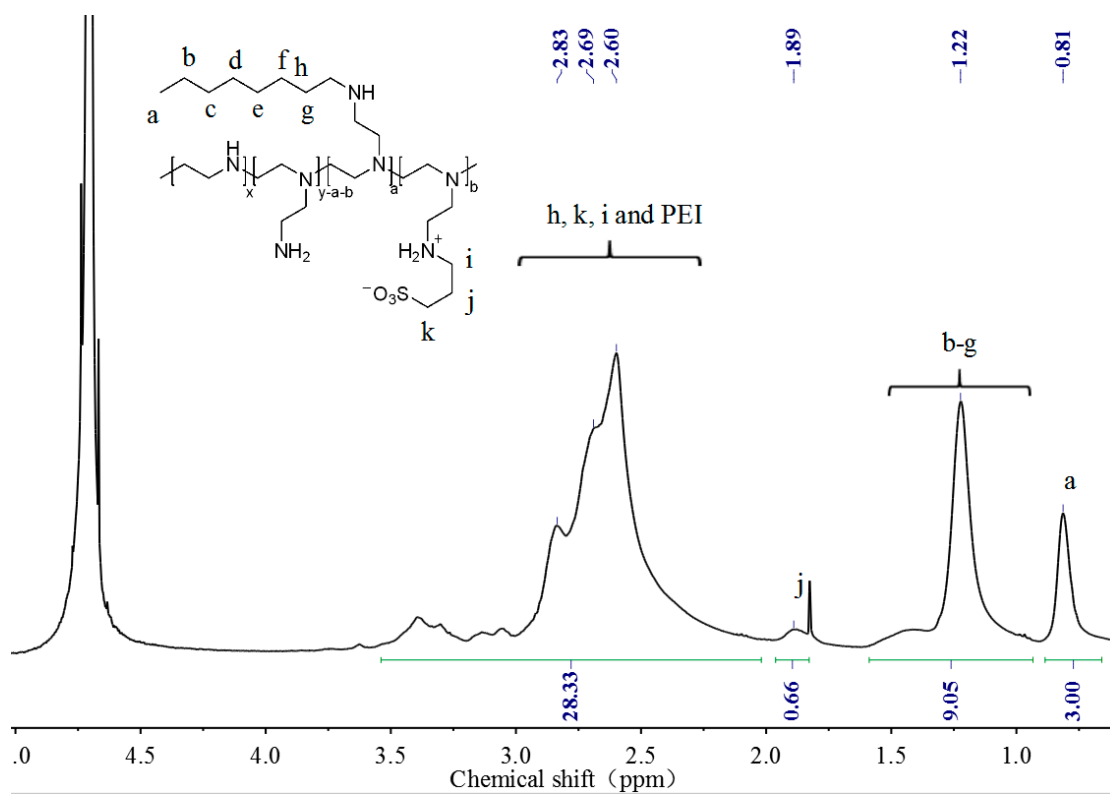

Figure S3. <sup>1</sup>H NMR spectra of 25-40-S-10

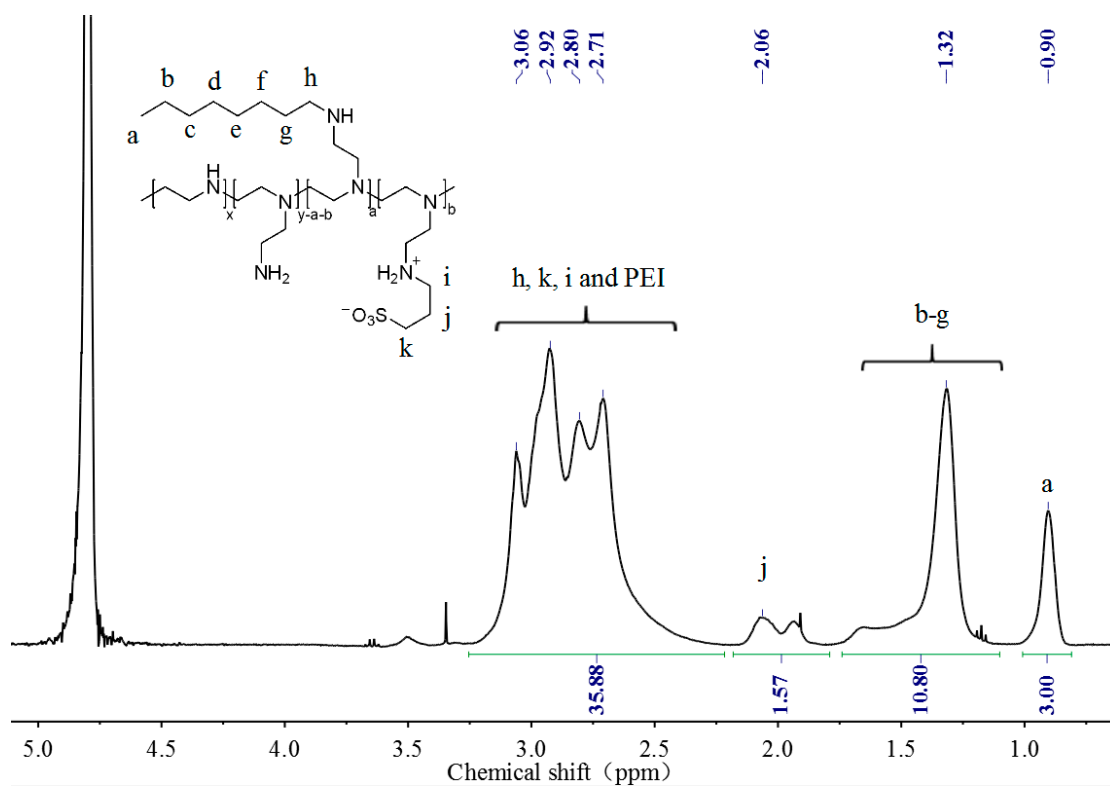

Figure S4. <sup>1</sup>H NMR spectra of 25-40-S-30

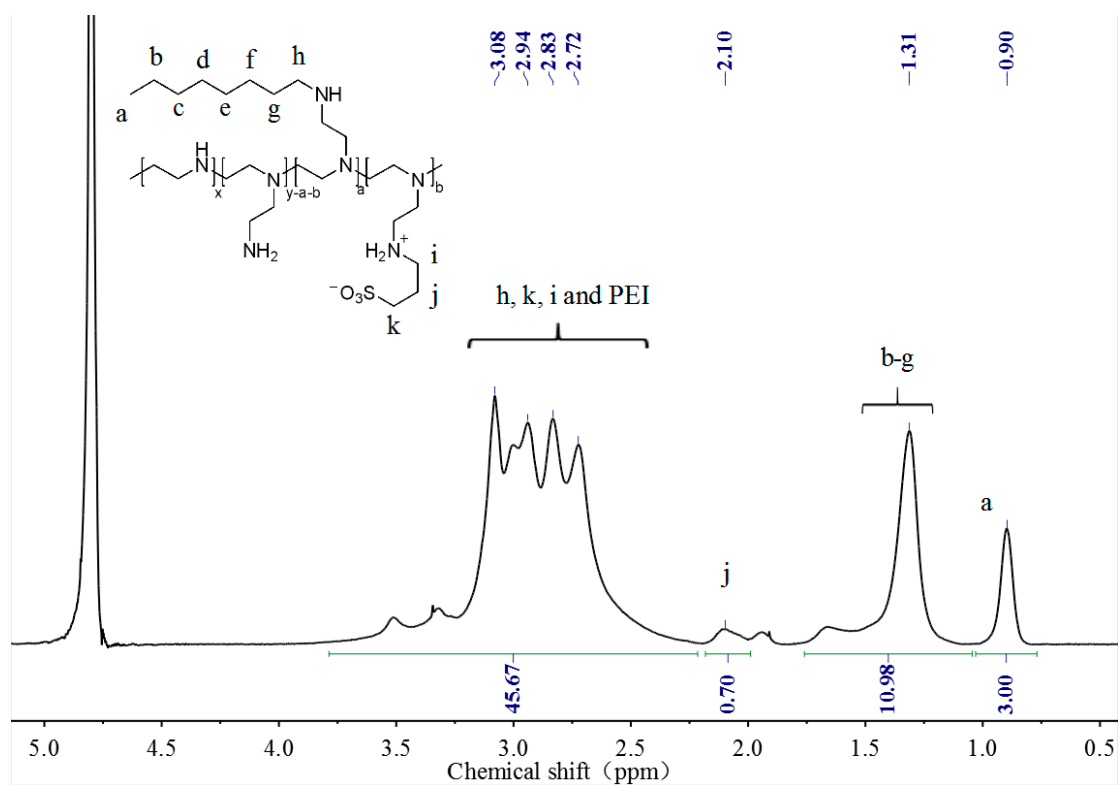

Figure S5.  $^1\text{H}$  NMR spectra of 10-40-S-10

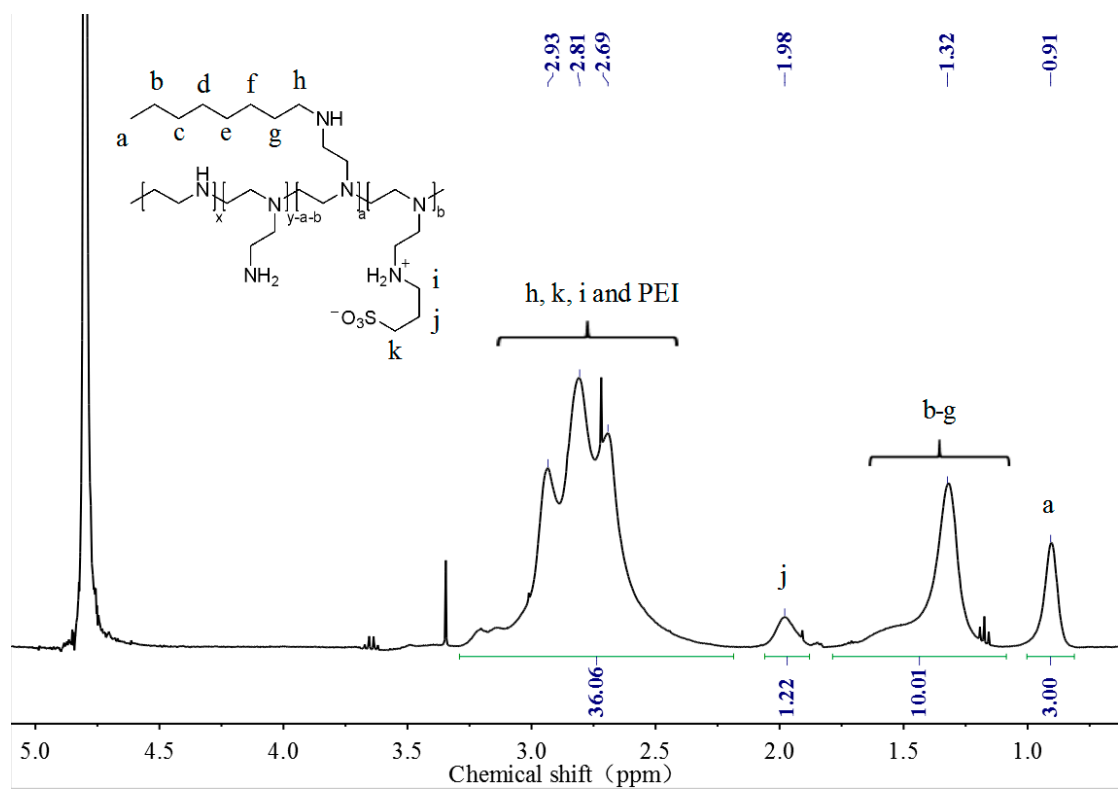

Figure S6.  $^1\text{H}$  NMR spectra of 10-40-S-20

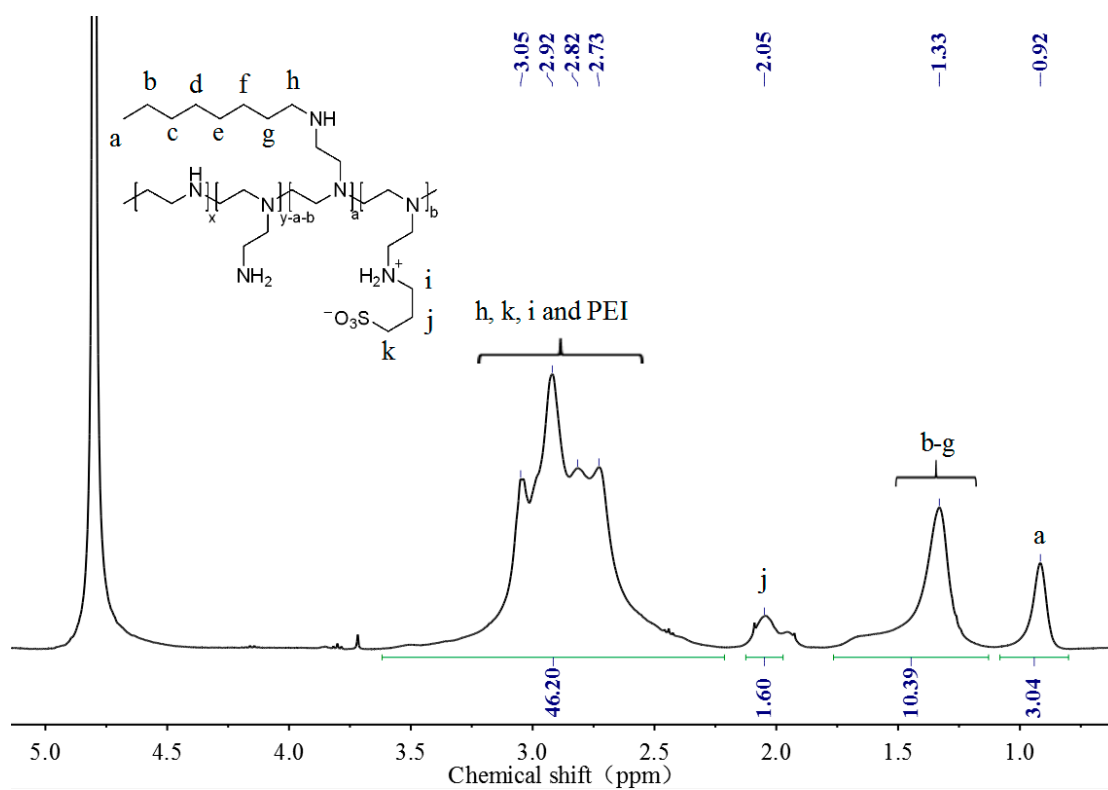

**Figure S7.**  $^1\text{H}$  NMR spectra of 10-40-S-30
